# Supplementary material for: Silicon-nanoforest-based solvent-free micro-supercapacitors with ultrahigh spatial resolutionviaIC-compatiblein situfabrication for on-chip energy storage
Source: Royal Society of Chemistry journal article supplement (doi:10.1039/d0ta07540j), 2020-01-01
Supplement: d0ta07540j1.pdf [file d0ta07540j1.pdf]

## Supporting Information

### **Silicon-nanoforest-based Solvent-free Micro-supercapacitor with Ultrahigh Spatial Resolution via IC-compatible *In-situ* Fabrication for On- chip Energy Storage**

Cheng Chi <sup>a,c†</sup>, Dezhao Li <sup>b†</sup>, Yang Li <sup>c</sup>, Xin Qi <sup>a</sup>, He Huang <sup>c</sup>, Qi Wang <sup>c</sup>, Chongjia Lin <sup>c</sup>, Xing Zhang <sup>a</sup>, Weigang Ma <sup>a\*</sup>, Baoling Huang <sup>c,d\*</sup>

<sup>a</sup> Key Laboratory for Thermal Science and Power Engineering of Ministry of Education, Department of Engineering Mechanics, Tsinghua University, Beijing, 100084, China

<sup>b</sup> Collaborative Innovation Center for Bio-Med Physics Information Technology, College of Science, Zhejiang University of Technology, Hangzhou 310023, China

<sup>c</sup> Department of Mechanical and Aerospace Engineering, The Hong Kong University of Science and Technology, Clear Water Bay, Hong Kong SAR, China

<sup>d</sup> The Hong Kong University of Science and Technology Foshan Research Institute for Smart Manufacturing, Clear Water Bay, Hong Kong SAR, China

<sup>†</sup> These authors contribute equally

\* Corresponding author: B. L. Huang, email: mebhuang@ust.hk; W. G. Ma, email: maweigang@tsinghua.edu.cn

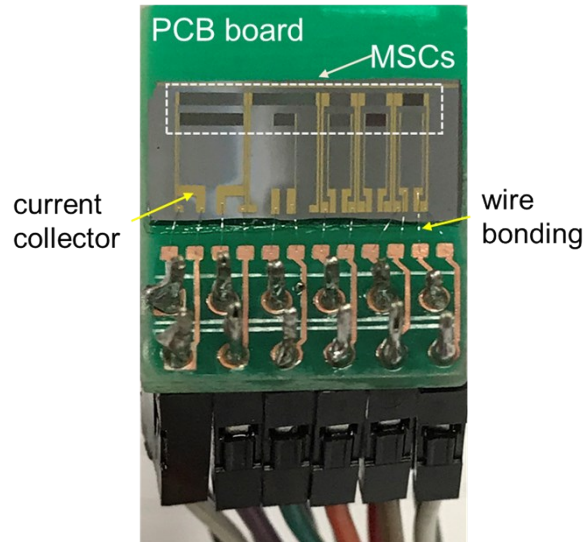

Figure S1. A home-made solid-state on-chip SNNF-MSC test setup.

**Measurement setup:** One batch of MSCs were cut from a Si wafer with about 500 samples and assembled with a home-built PCB board (green colour), as shown in Figure S1. The current collectors of each MSCs were connected to the PCB board conducting pads through the wire-bonding method. After welding, the MSCs were successfully connected with the corresponding external circuit for testing.

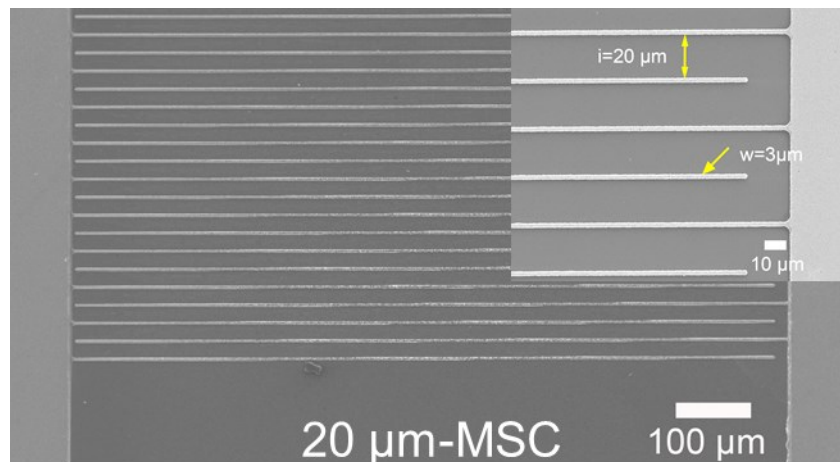

Figure S2. Top-view SEM image of 20  $\mu\text{m}$  MSC

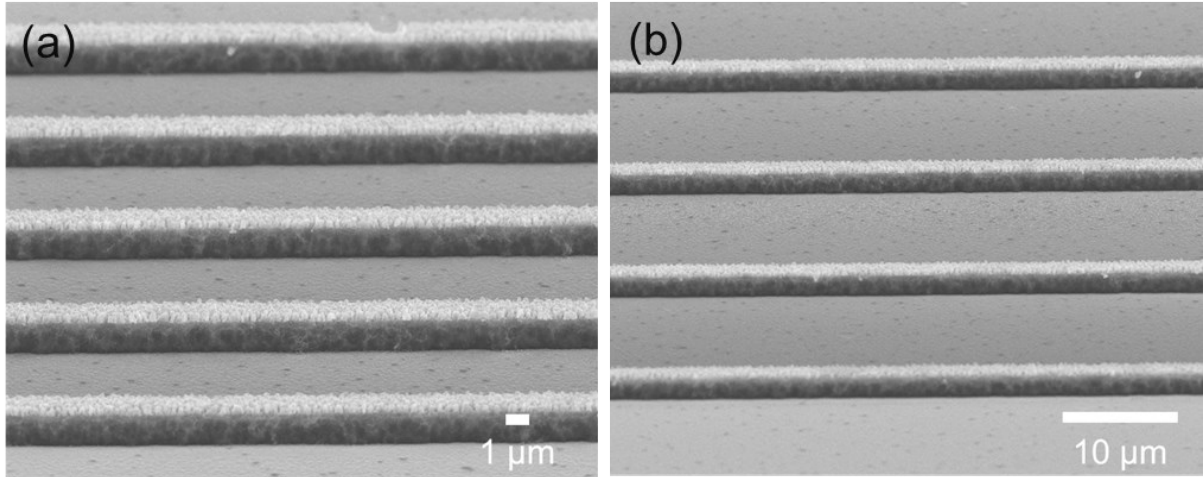

Figure S3. 45-degree-view SEM images of silicon-pillar nanoforest structure of (a) 10- $\mu\text{m}$ -MSC and (b) 20- $\mu\text{m}$ -MSC on a silicon chip.

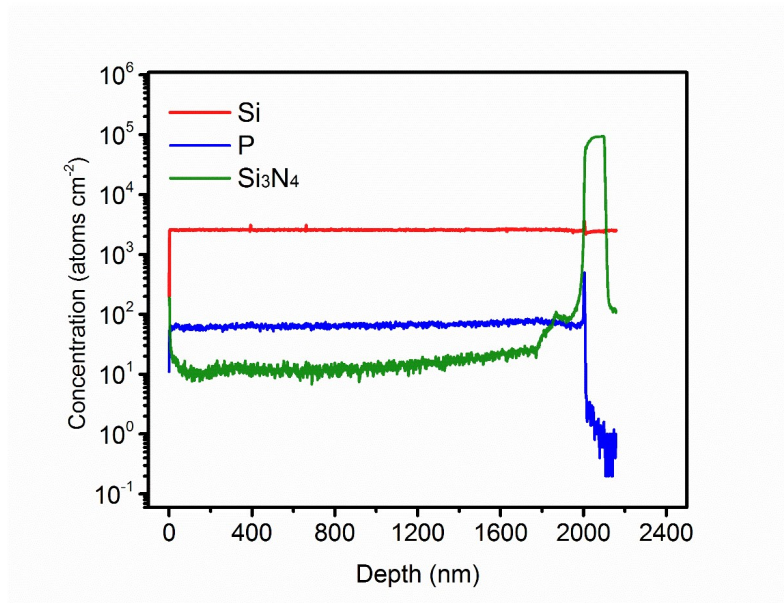

Figure S4. SIMS measurement result of phosphorus-doped n-type silicon.

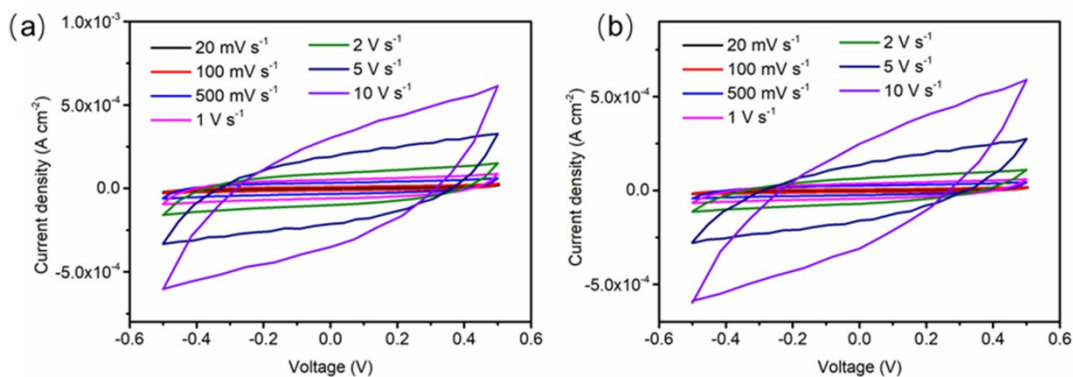

Figure S5. CV curves of (a) 10µm-MSCs and (b) 20 µm-MSCs at various scan rates 20 mV s<sup>-1</sup> to 10 V s<sup>-1</sup>.

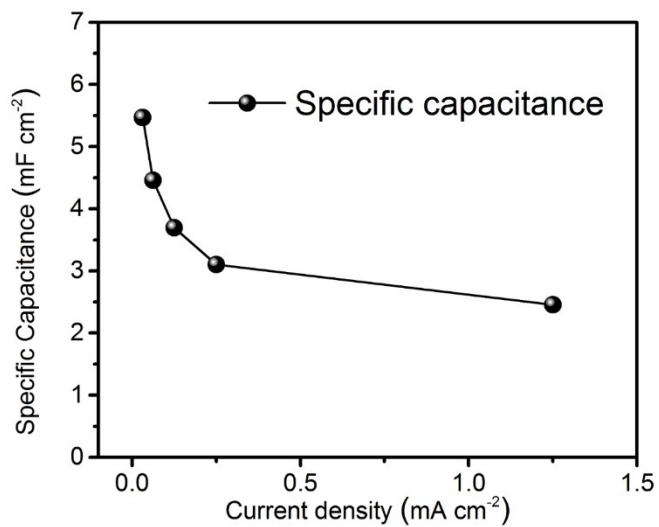

Figure S6. The specific capacitance of 5-µm-MSC at various charge-discharge current densities from 0.03 mA cm<sup>-2</sup> to 1.25 mA cm<sup>-2</sup>.

Table S1. Comparison of the spatial resolution and responding performance with recent MSCs made by different techniques.

| Electrode                                  | Method               | Width<br>/ $\mu\text{m}$ | Gap<br>/ $\mu\text{m}$ | Time<br>constant<br>/ms | Capacitance<br>/ $\text{mF cm}^{-2}$             | Energy<br>density/<br>$\text{mWh cm}^{-3}$ | Power<br>density/<br>$\text{W cm}^{-3}$ | Ref.                 |
|--------------------------------------------|----------------------|--------------------------|------------------------|-------------------------|--------------------------------------------------|--------------------------------------------|-----------------------------------------|----------------------|
| rGO/Au                                     | Laser<br>written     | 140                      | 60                     | 2.76                    | 0.77 @<br>$1\text{V s}^{-1}$                     | /                                          | /                                       | 1                    |
| LSG-MSC                                    | Laser-<br>scribed    | $\sim 20$                | $\sim 20$              | 19                      | 2.32 @<br>$16.8\text{ mA cm}^{-3}$               | 0.3                                        | 10                                      | 2                    |
| Ti <sub>3</sub> C <sub>2</sub> Tx<br>Mxene | Laser<br>cutting     | 1800                     | 284                    | /                       | 0.47 @<br>$1.0\text{ }\mu\text{A cm}^{-2}$       | 0.53                                       | 11.96                                   | 3                    |
| Mxene                                      | Laser<br>cutting     | 109.2                    | 598.6                  | /                       | 19.6 @<br>$20\text{ mV s}^{-1}$                  | 18                                         | 0.7                                     | 4                    |
| Activated<br>carbon                        | Jet<br>printing      | $\sim 10$                | <50                    | /                       | 0.127 @<br>$1\text{ mV s}^{-1}$                  | /                                          | /                                       | 5                    |
| Graphene                                   | Inkjet<br>printing   | 600                      | 300                    | 2000                    | 0.14 @<br>$5\text{ mV s}^{-1}$                   | /                                          | /                                       | 6                    |
| Si/TiC/CDC                                 | Photolith<br>ography | 100                      | 15                     | /                       | 400 F $\text{cm}^{-3}$ @<br>$1\text{ mV s}^{-1}$ | 9<br>$\mu\text{Wh cm}^{-2}$                | 0.5<br>$\text{W cm}^{-2}$               | 7                    |
| PEDOT/Au                                   | Photolith<br>ography | 100                      | 50                     | 10                      | 9 @<br>$35\text{ }\mu\text{A cm}^{-2}$           | 7.7                                        | 0.8                                     | 8                    |
| MnOx/Au                                    | Photolith<br>ography | 100                      | 100                    | 5                       | 32.8 F $\text{cm}^{-3}$                          | 1.75                                       | 3.4                                     | 9                    |
| Si                                         | Photolith<br>ography | 200                      | 200                    | /                       | 0.013 @<br>$100\text{ mV s}^{-1}$                | /                                          | /                                       | 10                   |
| <b>Si/Ni</b>                               | Photolith<br>ography | 3                        | 5                      | 1.09                    | 0.238 @<br>$1.25\text{ mA cm}^{-2}$              | 0.15                                       | 4.15                                    | <b>This<br/>work</b> |

### References

1. R.-Z. Li, R. Peng, K. D. Kihm, S. Bai, D. bridges, U. Tumuluri, Z. Wu, T. Zhang, G. Compagnini, Z. Feng and A. Hu, *Energ. Environ. Sci.*, 2016, **9**, 1458-1467.
2. M. F. El-Kady and R. B. Kaner, *Nat. Commun.*, 2013, **4**, 1475.
3. H. C. Huang, J. Q. He, Z. X. Wang, H. T. Zhang, L. Jin, N. J. Chen, Y. T. Xie, X. Chu, B. N. Gu, W. L. Deng and W. Q. Yang, *Nano Energy*, 2020, **69**, 104431.
4. Y. Y. Peng, B. Akuzum, N. Kurra, M. Q. Zhao, M. Alhabe, B. Anasori, E. C. Kumbur, H.

- N. Alshareef, M. D. Ger and Y. Gogotsi, *Energ. Environ. Sci.*, 2016, **9**, 2847-2854.
5. K. H. Lee, S. S. Lee, D. B. Ahn, J. Lee, D. Byun and S. Y. Lee, *Sci. Adv.*, 2020, **6**, eaaz1692
  6. J. T. Li, V. Mishukova and M. Ostling, *Appl. Phys. Lett.*, 2016, **109**, 123901.
  7. P. Huang, C. Lethien, S. Pinaud, K. Brousse, R. Laloo, V. Turq, M. Respaud, A. Demortiere, B. Daffos, P. L. Taberna, B. Chaudret, Y. Gogotsi and P. Simon, *Science*, 2016, **351**, 691-695.
  8. N. Kurra, M. K. Hota and H. N. Alshareef, *Nano Energy*, 2015, **13**, 500-508.
  9. W. P. Si, C. L. Yan, Y. Chen, S. Oswald, L. Y. Han and O. G. Schmidt, *Energ. Environ. Sci.*, 2013, **6**, 3218–3223.
  10. A. Soam, N. Arya, A. Singh and R. Dusane, *Chem. Phys. Lett.*, 2017, **678**, 46-50.
